# Supplementary material for: The role of software in science: a knowledge graph-based analysis of software mentions in PubMed Central
Source: PubMed Central journal article supplement (PMC8771769; doi:10.7717/peerj-cs.835), 2022-01-14
Supplement: peerj-cs-08-835-s001.pdf [file peerj-cs-08-835-s001.pdf]

# Supplementary Material

## The Role of Software in Science: A Knowledge Graph-based Analysis of Software Mentions in PubMed Central

David Schindler<sup>1</sup>, Felix Bensmann<sup>2</sup>, Stefan Dietze<sup>2,3</sup>, and Frank Krüger<sup>1,4</sup>

<sup>1</sup>Institute of Communications Engineering, University of Rostock, Germany

<sup>2</sup>GESIS - Leibniz Institute for the Social Sciences, Cologne, Germany

<sup>3</sup>Heinrich-Heine-University Düsseldorf, Germany

<sup>4</sup>Department Knowledge, Culture & Transformation, University of Rostock, Germany

| Wikipedia-PubMed Word2Vec ( $M_{L,sw,-}$ ) |             |             |             |             |             |             |
|--------------------------------------------|-------------|-------------|-------------|-------------|-------------|-------------|
| Trainable                                  | Precision   |             | Recall      |             | FScore      |             |
|                                            | Test        | Devel       | Test        | Devel       | Test        | Devel       |
| False                                      | 0.853±0.013 | 0.815±0.02  | 0.799±0.023 | 0.745±0.026 | 0.825±0.007 | 0.778±0.007 |
| True                                       | 0.881±0.009 | 0.842±0.018 | 0.786±0.021 | 0.722±0.008 | 0.831±0.011 | 0.777±0.005 |

Table A1: Overview of hyper-parameter results for using a Bi-LSTM-CRF ( $M_{L,sw,-}$ ) with pre-trained word embedding established by Pyysalo et al. (2013). The word embedding is either trained with the model (True) or frozen while training the model (False).

| Custom Embedding ( $M_{L,sw,-}$ ) |             |             |             |             |            |             |
|-----------------------------------|-------------|-------------|-------------|-------------|------------|-------------|
| Trainable                         | Precision   |             | Recall      |             | FScore     |             |
|                                   | Test        | Devel       | Test        | Devel       | Test       | Devel       |
| False                             | 0.863±0.018 | 0.821±0.017 | 0.814±0.006 | 0.764±0.014 | 0.838±0.01 | 0.791±0.006 |
| True                              | 0.866±0.017 | 0.831±0.02  | 0.797±0.01  | 0.752±0.015 | 0.83±0.008 | 0.789±0.004 |

Table A2: Overview of hyper-parameter results for using a Bi-LSTM-CRF ( $M_{L,sw,-}$ ) with a custom Word2Vec (Mikolov et al., 2013) model trained on all available articles from PMC OA. The word embedding is either trained with the model (True) or frozen while training the model (False).

| LSTM Size ( $M_{L,sw,-}$ ) |             |             |             |             |             |             |
|----------------------------|-------------|-------------|-------------|-------------|-------------|-------------|
| LSTM size                  | Precision   |             | Recall      |             | FScore      |             |
|                            | Test        | Devel       | Test        | Devel       | Test        | Devel       |
| 100                        | 0.864±0.019 | 0.831±0.017 | 0.806±0.01  | 0.752±0.011 | 0.834±0.008 | 0.789±0.003 |
| 50                         | 0.852±0.02  | 0.831±0.02  | 0.785±0.016 | 0.751±0.023 | 0.816±0.003 | 0.788±0.007 |

Table A3: Overview of results for tuning the size of the Bi-LSTM-CRF model.

| Downsampling negative sentences ( $M_{L,sw,-}$ ) |             |             |             |             |             |             |
|--------------------------------------------------|-------------|-------------|-------------|-------------|-------------|-------------|
| Downsampling                                     | Precision   |             | Recall      |             | FScore      |             |
|                                                  | Test        | Devel       | Test        | Devel       | Test        | Devel       |
| .75                                              | 0.855±0.022 | 0.821±0.028 | 0.82±0.018  | 0.765±0.015 | 0.836±0.003 | 0.791±0.006 |
| .50                                              | 0.832±0.03  | 0.817±0.022 | 0.804±0.025 | 0.756±0.017 | 0.817±0.017 | 0.785±0.002 |

Table A4: Overview of results for Bi-LSTM-CRF model with respect to downsampling of negative sentences containing no software entities, which leads to a higher relative frequency of software in the training set. Provided numbers indicate the percentage of remaining overall negative samples.

| Character dim ( $M_{L,sw,-}$ ) |             |             |             |             |             |             |
|--------------------------------|-------------|-------------|-------------|-------------|-------------|-------------|
| Layer size                     | Precision   |             | Recall      |             | FScore      |             |
|                                | Test        | Devel       | Test        | Devel       | Test        | Devel       |
| 10-5                           | 0.852±0.023 | 0.816±0.022 | 0.805±0.008 | 0.764±0.006 | 0.828±0.013 | 0.789±0.013 |
| 10-10                          | 0.854±0.013 | 0.836±0.015 | 0.791±0.007 | 0.75±0.004  | 0.821±0.006 | 0.79±0.007  |
| 10-20                          | 0.87±0.015  | 0.827±0.009 | 0.797±0.014 | 0.758±0.015 | 0.832±0.006 | 0.79±0.004  |
| 10-30                          | 0.837±0.018 | 0.812±0.013 | 0.81±0.017  | 0.769±0.01  | 0.823±0.006 | 0.79±0.003  |
| 25-10                          | 0.863±0.019 | 0.829±0.016 | 0.813±0.013 | 0.762±0.011 | 0.837±0.008 | 0.794±0.004 |
| 50-10                          | 0.879±0.003 | 0.841±0.007 | 0.791±0.004 | 0.747±0.009 | 0.833±0.003 | 0.791±0.008 |

Table A5: Overview of results for Bi-LSTM-CRF model with varying layer size for character feature generation. The first number refers to the size of the character embedding and the second to the size of the character LSTM.

| Adding Custom features ( $M_{L,sw,-}$ ) |             |             |             |             |            |             |
|-----------------------------------------|-------------|-------------|-------------|-------------|------------|-------------|
| Custom features                         | Precision   |             | Recall      |             | FScore     |             |
|                                         | Test        | Devel       | Test        | Devel       | Test       | Devel       |
| with                                    | 0.857±0.024 | 0.828±0.015 | 0.816±0.013 | 0.757±0.021 | 0.836±0.01 | 0.79±0.005  |
| without                                 | 0.866±0.017 | 0.831±0.02  | 0.797±0.01  | 0.752±0.015 | 0.83±0.008 | 0.789±0.004 |

Table A6: Overview of results for Bi-LSTM-CRF model if custom rules are included as features. Rules take distant supervision and string based features into account, their implementation details can be found the corresponding code. *with*: using custom features, *without*: not using custom features.

| Downsampling ( $M_{SB,sw,-}$ ) |             |             |             |             |             |             |
|--------------------------------|-------------|-------------|-------------|-------------|-------------|-------------|
| Downsampling                   | Precision   |             | Recall      |             | FScore      |             |
|                                | Test        | Devel       | Test        | Devel       | Test        | Devel       |
| None                           | 0.87±0.009  | 0.863±0.016 | 0.879±0.006 | 0.844±0.009 | 0.874±0.007 | 0.853±0.003 |
| .75                            | 0.871±0.016 | 0.85±0.015  | 0.899±0.011 | 0.871±0.011 | 0.885±0.007 | 0.86±0.006  |
| .50                            | 0.869±0.018 | 0.854±0.006 | 0.882±0.005 | 0.846±0.008 | 0.876±0.009 | 0.85±0.002  |

Table A7: Overview of results for downsampling with SciBERT model with respect to downsampling of negative sentences containing no software entities, which leads to a higher relative frequency of software in the training set. Provided numbers indicate the percentage of remaining overall negative samples.

| Dropout ( $M_{SB,sw,-}$ ) |                  |                  |                  |                  |                  |                  |
|---------------------------|------------------|------------------|------------------|------------------|------------------|------------------|
| Dropout                   | Precision        |                  | Recall           |                  | FScore           |                  |
|                           | Test             | Devel            | Test             | Devel            | Test             | Devel            |
| 0.0                       | $0.87\pm 0.009$  | $0.863\pm 0.016$ | $0.879\pm 0.006$ | $0.844\pm 0.009$ | $0.874\pm 0.007$ | $0.853\pm 0.003$ |
| .20                       | $0.888\pm 0.013$ | $0.865\pm 0.01$  | $0.898\pm 0.012$ | $0.86\pm 0.009$  | $0.893\pm 0.01$  | $0.863\pm 0.005$ |
| .30                       | $0.881\pm 0.013$ | $0.86\pm 0.014$  | $0.891\pm 0.011$ | $0.865\pm 0.008$ | $0.886\pm 0.011$ | $0.862\pm 0.004$ |

Table A8: Overview of applying dropouts to SciBERT fine-tuning. Values provide the percentage of performed dropouts.

| LR ( $M_{SB,sw,-}$ ) |                  |                  |                  |                  |                  |                  |
|----------------------|------------------|------------------|------------------|------------------|------------------|------------------|
| Learning rate        | Precision        |                  | Recall           |                  | FScore           |                  |
|                      | Test             | Devel            | Test             | Devel            | Test             | Devel            |
| $1e-5$               | $0.873\pm 0.009$ | $0.856\pm 0.006$ | $0.9\pm 0.006$   | $0.861\pm 0.01$  | $0.886\pm 0.004$ | $0.859\pm 0.005$ |
| $5e-5$               | $0.884\pm 0.008$ | $0.868\pm 0.006$ | $0.897\pm 0.011$ | $0.865\pm 0.012$ | $0.89\pm 0.004$  | $0.866\pm 0.008$ |
| $1e-6$               | $0.854\pm 0.013$ | $0.837\pm 0.011$ | $0.902\pm 0.016$ | $0.865\pm 0.013$ | $0.877\pm 0.004$ | $0.851\pm 0.003$ |
| $5e-6$               | $0.849\pm 0.012$ | $0.827\pm 0.008$ | $0.909\pm 0.014$ | $0.871\pm 0.013$ | $0.878\pm 0.011$ | $0.849\pm 0.01$  |

Table A9: Overview of adjusting the learning rate for SciBERT fine-tuning.

| Gradient Clipping ( $M_{SB,sw,-}$ ) |                  |                  |                  |                  |                  |                  |
|-------------------------------------|------------------|------------------|------------------|------------------|------------------|------------------|
| Gradient clip-<br>ping              | Precision        |                  | Recall           |                  | FScore           |                  |
|                                     | Test             | Devel            | Test             | Devel            | Test             | Devel            |
| 1.0                                 | $0.87\pm 0.009$  | $0.863\pm 0.016$ | $0.879\pm 0.006$ | $0.844\pm 0.009$ | $0.874\pm 0.007$ | $0.853\pm 0.003$ |
| 2.0                                 | $0.873\pm 0.004$ | $0.844\pm 0.011$ | $0.885\pm 0.009$ | $0.857\pm 0.013$ | $0.879\pm 0.004$ | $0.85\pm 0.002$  |
| 3.0                                 | $0.866\pm 0.007$ | $0.847\pm 0.008$ | $0.888\pm 0.02$  | $0.849\pm 0.013$ | $0.877\pm 0.007$ | $0.848\pm 0.005$ |

Table A10: Overview of performing gradient clipping at different thresholds for SciBERT fine-tuning.

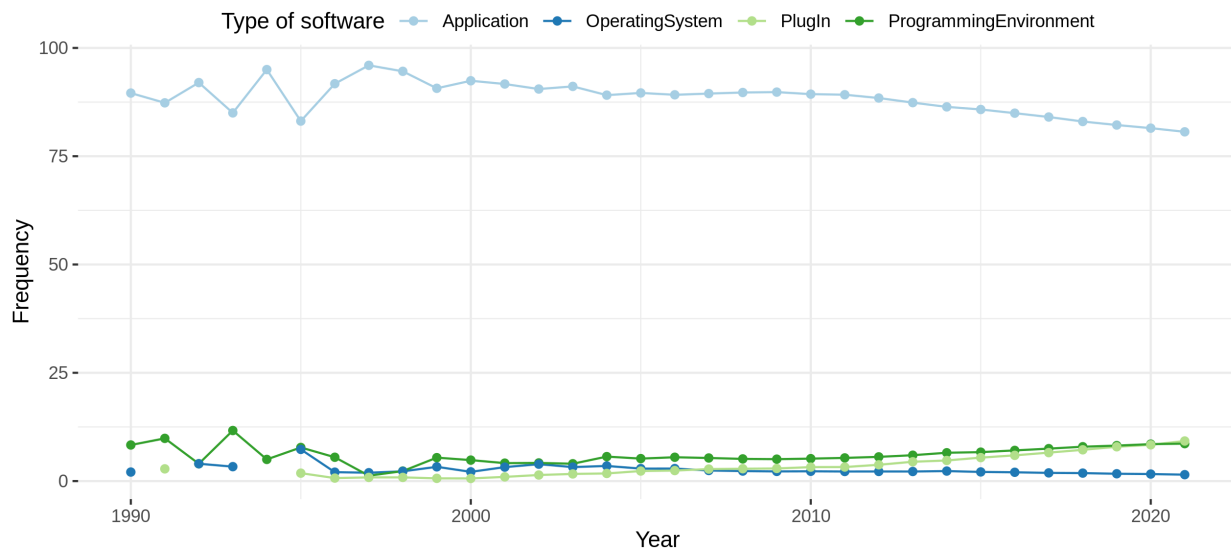

Figure A1: Relative frequencies of software types per year.

| Main research domain                         | # Articles | # Journals |
|----------------------------------------------|------------|------------|
| Medicine                                     | 1,938,910  | 4,455      |
| Biochemistry, Genetics and Molecular Biology | 1,039,046  | 1,560      |
| Agricultural and Biological Sciences         | 416,495    | 743        |
| Immunology and Microbiology                  | 266,712    | 451        |
| Chemistry                                    | 213,184    | 407        |
| Neuroscience                                 | 175,350    | 451        |
| Multidisciplinary                            | 161,532    | 26         |
| Pharmacology, Toxicology and Pharmaceutics   | 148,307    | 483        |
| Physics and Astronomy                        | 118,655    | 332        |
| Environmental Science                        | 101,434    | 462        |
| Materials Science                            | 92,072     | 341        |
| Chemical Engineering                         | 88,722     | 234        |
| Computer Science                             | 77,037     | 396        |
| Engineering                                  | 67,345     | 501        |
| Psychology                                   | 49,655     | 561        |
| Nursing                                      | 47,630     | 355        |
| Social Sciences                              | 46,730     | 1,136      |
| Mathematics                                  | 39,220     | 364        |
| Health Professions                           | 36,622     | 286        |
| Veterinary                                   | 29,924     | 104        |
| Dentistry                                    | 25,146     | 103        |
| Arts and Humanities                          | 8,756      | 469        |
| Energy                                       | 4,105      | 84         |
| Earth and Planetary Sciences                 | 4,025      | 247        |
| Business, Management and Accounting          | 2,574      | 173        |
| Decision Sciences                            | 2,507      | 100        |
| Economics, Econometrics and Finance          | 2,178      | 181        |

Table A11: Overview of the number of journals and articles per main research domain. Note that both journals and articles may have multiple categories.

## References

- Mikolov, T., Chen, K., Corrado, G., and Dean, J. (2013). Efficient estimation of word representations in vector space. *arXiv preprint arXiv:1301.3781*.
- Pyysalo, S., Ginter, F., Moen, H., Salakoski, T., and Ananiadou, S. (2013). Distributional semantics resources for biomedical text processing. In *Proceedings of the 5th International Symposium on Languages in Biology and Medicine*, pages 39–44.
